# Supplementary material for: Oral Microbiome Community Composition in Head and Neck Squamous Cell Carcinoma
Source: MDPI journal article supplement (doi:10.3390/cancers15092549), 2023-04-29
Supplement: s1 [file s1]

# Supplementary Material: Oral Microbiome Community Composition in Head and Neck Squamous Cell Carcinoma

**Table S1.** Epidemiologic and clinicopathologic characteristics of 52 cases and controls.

| Characteristics               | Case<br>(n = 52) | Control<br>(n = 102) | P-Value |
|-------------------------------|------------------|----------------------|---------|
| Age (mean±S.D)                | 59.15±13.10      | 59.01±10.24          | 0.9450  |
| BMI no. (%)                   |                  |                      | 0.6502  |
| < 20                          | 0 (0.00)         | 1 (1.04)             |         |
| 20-25                         | 12 (29.27)       | 20 (20.83)           |         |
| 25-30                         | 16 (39.02)       | 35 (36.46)           |         |
| > 30                          | 13 (31.71)       | 40 (41.67)           |         |
| Sex no. (%)                   |                  |                      | 0.7537  |
| Female                        | 10 (19.23)       | 17 (17.17)           |         |
| Male                          | 42 (80.77)       | 82 (82.83)           |         |
| Alcohol Use no. (%)           |                  |                      | 0.2849  |
| Never                         | 3 (7.32)         | 5 (5.26)             |         |
| Former                        | 12 (29.27)       | 18 (18.95)           |         |
| Current                       | 26 (63.41)       | 72 (75.79)           |         |
| Smoking Status no. (%)        |                  |                      | 0.0895  |
| Never                         | 15 (36.59)       | 51 (53.13)           |         |
| Former                        | 24 (58.54)       | 36 (37.50)           |         |
| Current                       | 2 (4.88)         | 9 (9.38)             |         |
| Stage no. (%)                 |                  |                      |         |
| 1 or 2                        | 18 (34.62)       | -                    |         |
| 3                             | 9 (17.31)        | -                    |         |
| 4                             | 25 (48.08)       | -                    |         |
| Site no. (%)                  |                  |                      |         |
| Larynx                        | 14 (26.92)       | -                    |         |
| Oral Cavity                   | 18 (34.62)       | -                    |         |
| Oropharynx                    | 16 (30.77)       | -                    |         |
| Hypopharynx                   | 1 (1.92)         | -                    |         |
| Nasal Cavity, Sinus, or Skull | 1 (1.92)         | -                    |         |
| Unknown Primary               | 2 (3.85)         | -                    |         |
| HPV Proxy Variable            | 16 (10.39)       | -                    |         |
| ACE Comorbidity Score         |                  |                      |         |
| None                          | 24 (46.15)       | -                    |         |
| Mild                          | 9 (17.31)        | -                    |         |
| Moderate                      | 15 (28.85)       | -                    |         |
| Severe                        | 4 (7.69)         | -                    |         |

<sup>a</sup>17 missing BMI, Fisher's Exact Test used

<sup>b</sup>3 missing sex

<sup>c</sup>18 missing values for alcohol use

<sup>d</sup>17 missing smoking status, Fisher's Exact Test used

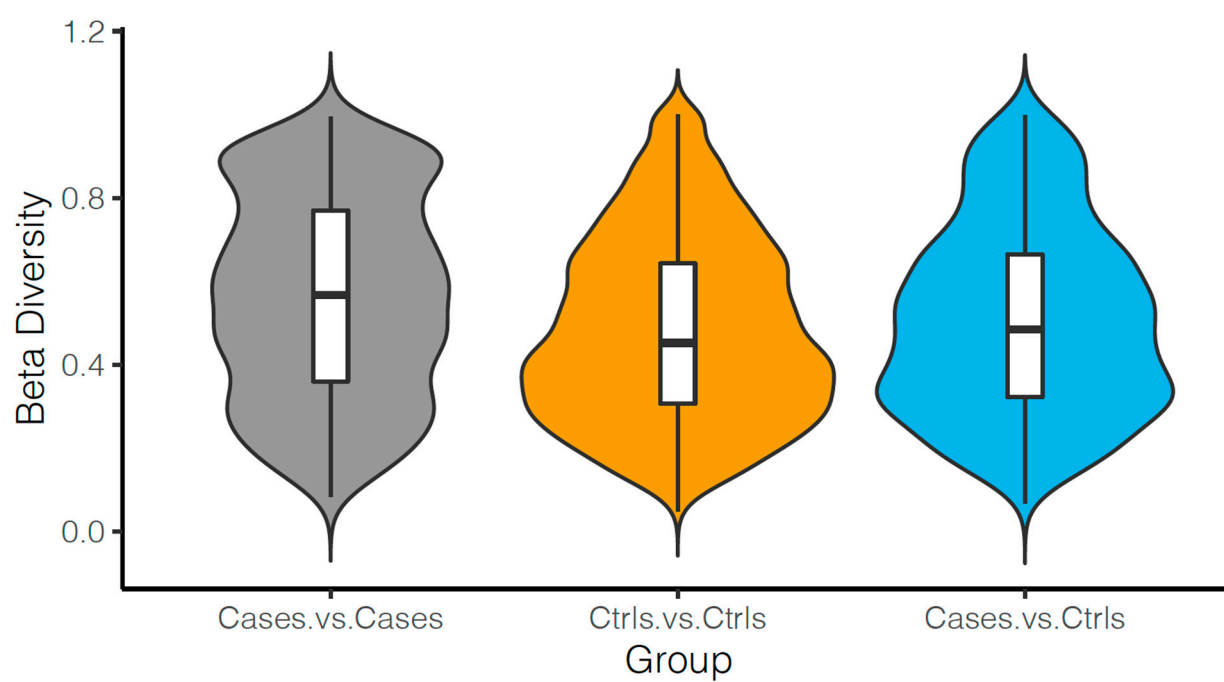

**Figure S1.** Violin Plots of Beta Diversity between cases vs. cases, controls vs. controls, and cases vs. controls.
